## Diversity of RNA viruses in declining Mediterranean forests

1 Sergio Diez-Hermano<sup>1\*</sup>, Pedro Luis Pérez-Alonso<sup>1</sup>, Wilson Acosta Morell<sup>1</sup>, Jonatan Niño-  
2 Sanchez<sup>1</sup>, Marcos de la Peña<sup>2</sup>, Julio Javier Diez<sup>1\*</sup>

3 <sup>1</sup> Department of Plant Production and Forest Resources, Sustainable Forest Management Research  
4 Institute (iuFOR). Higher Technical School of Agricultural Engineering (ETSIIAA), University of  
5 Valladolid, Palencia, Spain.

6 <sup>2</sup> Institute for Plant Molecular and Cellular Biology (CSIC-UPV), Valencia, Spain.

7

8 **\*Authors for correspondence:**

9 Julio Javier Diez Casero

10 Higher Technical School of Agricultural Engineering of Palencia (ETSIIAA), Campus La Yutera  
11 Avenida de Madrid, 503, 34004 Palencia, Spain

12 Phone: +34979108420

13 E-mail: [JulioJavier.Diez@uva.es](mailto:JulioJavier.Diez@uva.es)

14

15 Sergio Diez-Hermano

16 Higher Technical School of Agricultural Engineering of Palencia (ETSIIAA), Campus La Yutera  
17 Avenida de Madrid, 503, 34004 Palencia, Spain

18 Phone: +34979108432

19 E-mail: [sergio.diez.hermano@uva.es](mailto:sergio.diez.hermano@uva.es)

### 20 Abstract

21 Global change alters forestry habitats and facilitates the entry of new pathogens that don't share a co-  
22 evolution history with the forest, leading them into a spiral of decline. As a result, relationships  
23 between forests' organisms get disbalanced. Under this scenario, RNA viruses are of particular  
24 interest, as they participate in many of such relationships thanks to their ability to infect a wide range  
25 of hosts, even from different kingdoms of life. For this reason, the study of RNA viruses is essential  
26 to understand how viral flow across different hosts might occur, and to prevent possible outbreaks of  
27 diseases in the future. In this work the RNA virus diversity found in trees, arthropods and fungi from  
28 declining Mediterranean forests is described. To this extent, three habitats (*Quercus ilex*, *Castanea*  
29 *sativa* and *Pinus radiata*) were sampled and RNAseq was performed on tree tissues, arthropods and  
30 fungi. 146 viral sequences were detected by searching for matches to conserved motifs of the RNA-  
31 dependent RNA polymerase (RdRP) using Palmscan. Up to 15 viral families were identified, with  
32 Botourmiaviridae (28.7%) and Partitiviridae (9.6%) being the most abundant. In terms of genome  
33 type, ssRNA(+) viruses were the most represented (83.5%), followed by dsRNA (15%) and two  
34 ssRNA(-) representatives. Viruses belonging to families with cross-kingdom capabilities such as  
35 Hypoviridae (1), Mitoviridae (6) and Narnaviridae (5) were also found. Distribution of viruses across  
36 ecosystems was: *Q.ilex* (57.5%), *P.radiata* (26.7%) and *C.sativa* (15.8%). Interestingly, two RdRP  
37 sequences had no matches in available viral databases. This work constitutes a starting point to gain  
38 insight into virus evolution and diversity occurring in forests affected by decline, as well as searching  
39 for novel viruses that might be participating in unknown infectious pathways.

40 **Key Words:** virome, metavirome, virosphere, forest pathology, *Quercus*, *Castanea*, *Pinus*

## 41 1 Introduction

42 In recent decades, it has been shown that all biotic constituents of forest ecosystems can carry and be  
43 affected by viruses. In addition to plant viruses, all plant-associated organisms (bacteria, protists,  
44 fungi, vertebrate and invertebrate animals) have their own viral communities (virome), and together  
45 they form the metavirome or virosphere of the forest system. Currently, 64 virus species are known  
46 to affect 19 forest plant species in temperate and urban forests (Rumbou et al., 2021). Based on  
47 genome type (single-stranded or ss, double-stranded or ds, positive-sense, or antisense), most are  
48 (+)ssRNA viruses belonging to the *Beta-*, *Seco-*, *Bromo-*, *Tombus-*, *Virga-* and *Mayoviridae* families.  
49 In comparison, only one (-)ssRNA family has been found so far, the *Emaraviridae*, consisting of four  
50 species. Three dsRNA viruses have also been described in pine and ash, as well as three other  
51 dsDNA viruses with retrotranscriptase capacity in *Betula* sp., *Castanea sativa* and *Fraxinus*  
52 *americana*. Among all the viral diversity described, the genera *Emaravirus* and *Badnavirus* are  
53 considered to be tree pathogens and, therefore, causative agents of the diseases with which they are  
54 commonly associated.

55 In contrast to trees' virome, most viruses affecting forest fungi and oomycetes have a dsRNA  
56 genome and belong to the *Partiti-*, *Toti-*, *Curvula-* and *Reoviridae* families. Viruses with a (+)ssRNA  
57 genome are classified within the families *Hypo-*, *Endorna-*, *Botourmia-*, *Fusari-* and *Mitoviridae*, and  
58 some of their members have been found to be able to induce changes in the level of pathogenicity of  
59 forest pathogens of particular relevance, such as *Cryphonectria parasitica*, *Ophiostoma novo-ulmi*,  
60 *Gremmeniella abietina*, *Fusarium circinatum*, *Heterobasidion annosum* and *Hymenoscyphus*  
61 *fraxineus* (van Diepeningen, 2021). In addition, the first (-)ssRNA and ambivalent (combining + and  
62 - sense strands in their genome) viruses of fungal pathogens have recently been described in  
63 *Armillaria* sp. and *C. parasitica* (Forgia et al., 2021; Linnakoski et al., 2021). Finally, high viral  
64 diversity has also been found in soil pathogens such as *Rosellinia necatrix*, leading to the discovery  
65 of new *Hypoviridae* and candidates yet to be classified, such as *Fusagraviruses* and *Megatoviruses*  
66 (Arjona-López et al., 2018).

67 Current virus taxonomy is based on the presence of homologous genomic structures between viral  
68 families. In particular, plant viruses tend to cluster with fungal and arthropod viruses (Lefeuvre et al.,  
69 2019). This is indicative of the ability of some viruses to overcome barriers between biological  
70 kingdoms and infect a wide diversity of organisms (cross-kingdom viruses), which, in the context of  
71 forests, mainly involves trees, fungi and insects. Cross-kingdom viruses represent a considerable  
72 proportion of the fungal virome, to the extent that 50% of known fungal species carry plant viruses  
73 (Cao et al., 2022). Some members of the *Toti-*, *Partiti-*, *Endorna-* and *Chrysoviridae* families are  
74 plant viruses capable of replicating in meristematic cells and infecting fungi in vitro (Nerva et al.,  
75 2017). The first experimental evidence of a natural cross-kingdom infection was found in  
76 *Rhizoctonia solani*, which was able to acquire and transmit the Cucumber mosaic virus from its host  
77 plant (Andika et al., 2017). Fungal and plant viruses are able to act synergistically and facilitate  
78 transmission even between vegetatively incompatible fungal strains, using the plant as a transport  
79 pathway. This phenomenon has been described experimentally for the *Cryphonectria hypovirus-1*  
80 and the Tobacco mosaic virus, and active expression of the p29 gene of the former and the movement  
81 proteins (MPs) of the latter were necessary for it to take place (Bian et al., 2020). MPs are unique to  
82 plant viruses and are necessary for viral particles to move from cell to cell. However, fungal viruses,  
83 which do not usually have an extracellular phase, lack them. This display of functional cooperation  
84 gives an idea of the potential of viruses to infect unexpected organisms, regardless of the  
85 evolutionary distance that separates them.

## Trees' health condition and mycobiota composition

86 Insects are also susceptible to cross-kingdom viral infections. Despite being the most numerous  
87 group of vectors transmitting plant viruses, few studies have been devoted to unravelling the virome  
88 of insects affecting forest species. Once inside the insect, plant viruses can develop forms of non-  
89 persistent transmission (in external structures of the insect) or circular transmission (using internal  
90 compartments as reservoirs) (Whitfield et al., 2015). In some cases, circular transmission may  
91 involve replication of the plant virus within the cells of the insect host. In the case of European  
92 forests, viruses have been found in *Lepidoptera* such as *Lymantria dispar*, *Thaumetopoea*  
93 *pityocampa* and *Leucoma salicis*, in *Coleoptera* such as *Ips typographus* and in *Hymenoptera* such as  
94 *Neodiprion sertifer* (Jakubowska et al., 2015; Paraskevopoulou et al., 2021). Fungal viruses capable  
95 of infecting insects, such as some DNA viruses of the *Genomoviridae* family, have also been  
96 detected (Liu et al., 2016).

97 Yet, despite having more information than ever about the viral component of forest ecosystems,  
98 studies on the virosphere of Mediterranean forests are still lacking, to the best of our knowledge.  
99 Mediterranean forests rank among the terrestrial ecosystems threatened by globalisation and climate  
100 change the most (Newbold et al., 2020). Weather predictions for the coming decades project drastic  
101 reductions in precipitation patterns and rising temperatures, exposing forests in the Mediterranean  
102 basin to long periods of drought and massive forest fires (Nunes et al., 2022). The high frequency of  
103 climatic adversities decreases the ability of Mediterranean tree species to cope with the high number  
104 of pests and diseases spread by globalisation, facilitating the invasion of new pathogens with which  
105 forests have not had the opportunity to co-evolve. There is evidence that most RNA viruses, many of  
106 which are known causative agents of emerging infectious diseases, are contained in forest ecosystems  
107 and are often released as a result of forest disturbance and expanding human populations (Wilcox and  
108 Ellis, 2006; Mackay and Arden, 2016), increasing the risk that unexpected pandemics might arise.

109 Therefore, given the capacity of RNA viruses to jump between organisms and even to alter essential  
110 characteristics such as the pathogenicity level of their host, getting a better understating of the viral  
111 flows that might occur in endangered ecosystems is of the essence. With this purpose, the  
112 metavirome of three Mediterranean forests affected by decline is described here, by means of high-  
113 throughput sequencing and for different kingdoms of life, including plants, fungi and arthropods.

## 114 2 Materials and methods

### 115 2.1 Sampling sites and procedure

116 Bark, wood and leaves' samples were extracted from trees of *Castanea sativa* (chestnut), *Quercus*  
117 *ilex* (holm oak) and *Pinus radiata* (Monterrey pine) from Castile and Leon (Spain) forests (Table 1  
118 and Figure 1). Each sampling site corresponded to a single tree species. Sampling was conducted for  
119 all four sites in June and July 2021. Material from sixteen trees was sampled and pooled per plot.  
120 After removing the external bark, one sample was taken per tree from the main trunk at the height of  
121 50 cm over the collar, to a depth of 2-3 cm. Only xylem and the internal bark layer (phloem) were  
122 considered in the analysis. Living individuals of common arthropods (ants, grasshoppers, beetles)  
123 were also collected (8-10 specimens each). Samples were stored at 4°C for one day prior to  
124 processing and at -80°C afterwards.

### 125 2.2 Sample processing and sequencing

126 Fungi were cultured from the trees and arthropods' samples. Bark, wood and leaves were cut into  
127 small pieces and disposed on Petri dishes with PDA+ampicilin (100 ug/ml) medium for 3 days at  
128 25°C. Arthropods were washed in a Ringer solution and 50 ul of the solution were poured and spread

129 also on Petri dishes with PDA+ampicilin medium for 3 days at 25°C. Visually different fungal  
130 colonies were picked, isolated and stored at -80°C.

131 Frozen samples of bark, wood, leaves and arthropods were pulverised and pooled per sampling site  
132 prior to RNA extraction. Isolated fungi were pooled likewise. Total RNA was purified from trees,  
133 arthropods and fungi using Spectrum Plant kit (Sigma Aldrich, MO, USA) following the  
134 manufacturer's protocol. Quality control with Qubit yielded RIN values > 7 for all extractions.  
135 Samples were sent to Macrogen (South Korea) for sequencing (Illumina Miseq with TruSeq libraries  
136 and ribosomal RNA depletion, 150 bp paired-end reads).

### 137 **2.3 Bioinformatic analysis**

138 Raw reads were cleaned and trimmed using Cutadapt v.3.5 (-q 20) (Martin, 2011). Contigs were  
139 assembled with SPAdes v.3.15.5 (rnaviralSPAdes.py) (Prijibelski et al., 2020) and scanned for the  
140 presence of RNA-dependent RNA polymerase (RdRp) sequences using Palmscan v1.0 (Babaian &  
141 Edgar, 2022), a software that searches sequencing data for matches with the conserved motifs A, B  
142 and C (the "palmprint") from the primary protein sequence of RdRp. RdRp sequences that matched  
143 any non-viral organism in nr NCBI database were discarded. Viral identities were assigned to the  
144 remaining RdRps by aligning the found sequences against PALMdb (Edgar et al., 2022) and RdRp-  
145 scan (Charon et al., 2022) databases using DIAMOND v2.1.8 (Buchfink et al., 2021). Taxonomy  
146 resolution was established according to different percent identity thresholds (species at >90%, genus at  
147 >70% and family at >30%). Multiple sequence alignment was performed with MAFFT (E-INS  
148 iterative refinement method) (Katoh et al., 2019) and used as input for phylogenetic tree building on  
149 IQTREE (default parameters) (Nguyen et al., 2015) with ultrafast bootstrap (Hoang et al., 2018) and  
150 automatic model selection (Kalyaanamoorthy, 2017).

151 Viral diversity analyses were performed and visualised in R environment 4.2.1 (R Core Team, 2022)  
152 using the packages *ggtree* (Yu, 2020), *ggmsa* (Zhou et al., 2022) and *seqinr* (Charif et al., 2023).  
153 Sequence logos were plotted with Skylign (Wheeler et al., 2014)

## 154 **3 Results**

### 155 **3.1 Taxonomy and distribution of RdRps**

156 A total of 146 RdRps were found among all analysed samples. Of these, 122 (83%) were assigned to  
157 existing viral groups with different levels of resolution, 22 (15%) had matches in current databases  
158 but lacked taxonomy assignment and 2 were absent from any database (Table 2 and Table 3). Most of  
159 the RdRps were found in the habitat of *Q. ilex* (57.5%), followed by *P. radiata* (26.7%) and *C. sativa*  
160 (15.8%) (Figure 2 and Table 4). Regarding sample type, half of the RdRps were found in tree  
161 samples (46.5%), followed by arthropods (21.2%), fungi from arthropods (16.4%) and fungi from  
162 trees (15.7%).

163 The most numerous viral families were Botourmiaviridae (28.7%), Partitiviridae (9.6%), Mitoviridae  
164 (4.1%) and Narnaviridae (4.1%) (Figure 3). In terms of genome type, ssRNA(+) viruses were the  
165 most represented (83.5%), followed by dsRNA (15%) and two ssRNA(-) representatives, Chuviridae  
166 and Phenuiviridae, found in arthropods from pine and chestnut habitats, respectively.

167 The distribution of RdRps revealed that sample types have different viral profiles (Figure 3). Some of  
168 the families were exclusive to fungi (Totiviridae, Fusariviridae, Hypoviridae and Polymycoviridae)  
169 or arthropods (only in chestnut habitat: Iflaviridae, Nodaviridae, Phenuiviridae; and only in pinus



## Trees' health condition and mycobiota composition

170 habitat: Sinhaliviridae, Chuviridae and Dicistroviridae). One family was found to be exclusive to  
171 holm oak's habitat (Tombusviridae), regardless of sample type. Endornaviridae family was found  
172 only in pines whereas Botybirnavirus was exclusive to holm oaks.

### 173 3.2 Phylogeny of RdRps

174 MSA of the RdRps resulted in the dendrogram shown in Figure 4. RdRps from trees and arthropods'  
175 samples clustered in two distinct groups, while RdRps from isolated fungi were interspersed, forming  
176 heterogeneous subgroups. No grouping by habitat was observed except for most RdRps from holm  
177 oak samples clustering together within the Lenarviricota supernode. All of the RdRps identified up to  
178 species levels belonged to arthropods' samples: Lake sinai virus 1 and 2, Deformed wing virus,  
179 Black queen cell virus and Hubei picornalike virus 15, in the Kitrino- and Pisuviricota nodes. In  
180 nodes where two RdRp from trees' fungi and arthropods' fungi were paired, as is the case for some  
181 Betapartitivirus and Narnaviridae (bottom part of the tree), their sequences shared 100% identity. In  
182 all other cases the homology in the conserved RdRp motifs A, B and C was at least greater than 50%.

183 RdRps existing in current databases but lacking a taxonomy (NA in Figure 4) were classified as  
184 Kitrino-, Duplorna- or Pisuviricota. As for the unknown RdRps (with bona-fide A, B and C motifs  
185 but absent from databases), one shared high sequence similarity with the Hypoviridae representative  
186 and was found in the same sample type (fungi from holm oaks), whereas the other was located in the  
187 vicinity of ssRNA(-) viruses (Chuviridae and Phenuiviridae) but shared no common origin with  
188 them.

## 189 4 Discussion

190 The study of environmental viromes has grown in popularity thanks to recent major advances in  
191 massive sequencing technologies. The scale of these analyses is highly variable, with some studies  
192 focusing on a particular species (Faizah et al., 2020; Wu et al., 2015), complete ecosystems (Hurwitz  
193 & Sullivan, 2013) or different environments (Daugrois et al., 2021; Ma et al., 2021). However, most  
194 of the advances in plant virology focus on crops or fruit trees of economic interest, which contrasts  
195 the scarcity of such studies in forestry (Rumbou et al., 2021). Reducing the scope even more to  
196 Mediterranean forests, with the Mediterranean basin being considered a biodiversity hotspot (Médail  
197 et al., 2019), hardly any information is found. In the present work, focused on 3 Mediterranean forest  
198 habitats in north-western Spain, 146 RdRps of viral origin have been found, of which 22 have no  
199 clear taxonomy yet and 2 are completely unknown. This shows the great lack of knowledge about  
200 viral diversity that exists in our own forests.

201 Most of the reported RdRps have been identified as ssRNA(+) viruses, which are accepted to be the  
202 evolutionary origin of the other two identified groups, ssRNA(-) and dsRNA (Koonin et al., 2015,  
203 2021). Holm oak's habitat showed the highest viral richness (57.5% of all the RdRps). Holm oak  
204 samples were taken in a "dehesa", a unique ecosystem in the Iberian Peninsula that has been  
205 modified by man to simultaneously obtain livestock and non-timber forest resources. This makes  
206 dehesas an ecosystem with particularly high biodiversity (Moreno et al., 2016; Rodríguez-Rojo et al.,  
207 2022), so it is not surprising that there is also a high viral diversity that has never been investigated.

208 Some of the viral families have been found to be ubiquitous across sample types and habitats, which  
209 could be interpreted as a first indication of their cross-kingdom potential. This is the case for  
210 Botourmiaviridae, Partitiviridae, and Narnaviridae. Many genera in Botourmiaviridae family are  
211 known to infect fungi, and some of them have been identified on grapevine leaves affected by the  
212 oomycete *Plasmopara viticola* (Chiapello et al., 2020). Mycoviruses of this family can persist in their

213 fungal host without the need for a capsid and are thought to require only the RdRp to replicate (Wang  
214 et al., 2020). Only the genus Ourmiavirus infects plants exclusively (Rastgou et al., 2009). The RdRp  
215 of this genus is most similar to that of the genera Mitovirus and Narnavirus (family Narnaviridae)  
216 and its movement protein (MP) is similar to that of the family Tombusviridae. The envelope protein  
217 bears some similarity to that of some plant or animal viruses. These viruses are very easily  
218 transmitted mechanically and no vector has been identified, so it is thought that there could be a  
219 horizontal transmission (Ayllón et al., 2020).

220 The Narnaviridae family has the simplest genome of all RNA viruses, encoding only one polypeptide  
221 in which RdRp is found. Within this family, the genus Narnavirus replicates in the cytoplasm, while  
222 Mitoviruses replicate in mitochondria and can cause hypovirulence in pathogenic fungi (de Rezende  
223 et al., 2021; Hillman & Cai, 2013). Phylogenetically, Narnaviruses are much more closely related to  
224 Ourmiaviruses (family Botourmiaviridae) than to Mitoviruses. Although no Mitoviruses have been  
225 found outside fungi, we've found one RdRp identified as a Mitovirus in a pine tree sample.  
226 Nonetheless, Mitovirus sequences have been found before in plant mitochondrial sequences (Hong et  
227 al., 1998; Marienfeld et al., 1999). As for the Partitiviridae family, many of its genera have  
228 characteristic hosts, which can be plants (Deltapartitivirus), fungi (Gammapartitivirus) and protozoa  
229 (Cryspovirus). Many sequences of this family have also been identified in arthropods (Cross et al.,  
230 2023). Here we've identified one genus, Betapartitivirus, whose hosts can be plants and fungi.

231 Regarding the family Tombusviridae, it has been described in animals (Yin et al., 2022), plants  
232 (Lappe et al., 2022) and fungi (Botella et al., 2022), matching our finding of this family in all sample  
233 types although restricted to holm oak habitat. Tombusviridae infections are usually limited to the root  
234 system, but they can infect the whole plant thanks to their MPs (Canuti et al., 2023). Tombusviridae  
235 are transmitted mechanically, by contact, through seeds or through a vector such as a fungus or an  
236 insect, depending on the genus. The Solemoviridae family infects plants, but it is known that one of  
237 its modes of transmission is also the use of insects as vectors (Sõmera et al., 2021), which may be  
238 one of the reasons why we have found this family only in arthropods.

239 For some families, only one RdRp has been detected in the samples analysed, but evidence of its  
240 ability to infect several kingdoms has been described. This is the case for the Totiviridae, Chuviridae,  
241 Phenuiviridae, Chrysoviridae, Polymicoviridae, Endornaviridae and two riboviruses with incomplete  
242 classification: the genus Botybirnavirus and the species Hubei picorna-like virus 15 (unclassified  
243 ribovirus). The family Totiviridae is associated with latent infections in fungi and protozoa. The  
244 families Chuviridae and Phenuiviridae, exclusive to insects, are the only ones that possess a ssRNA(-  
245 ) genome. Many endogenous viral elements inserted within the host genome have been related to  
246 Chuviridae infections (Dezordi et al., 2020). The Chrysoviridae family infects fungi, plants and  
247 insects (Kotta-Loizou et al., 2020). The Polymycoviridae family affects fungi in which it causes  
248 hypovirulence or hypersensitivity to antifungals or bacteria, and is even capable of modulating  
249 carbon, nitrogen and iron metabolism (Kotta-Loizou & Coutts, 2022). Endornaviridae are ssRNA(+)  
250 viruses that do not have a true capsid as the genome is encapsulated together with a viral replicase  
251 and are able to infect plants and fungi. The genus Botybirnavirus (Orthornavirae) has fungi as natural  
252 hosts (Hough et al., 2023), however, we've found this RdRp in a holm oak tree sample, which could  
253 be indicative of some cross-kingdom capability.

254 Finally, some limitations of the present study should be noted. First, many sequences in viral  
255 databases have none or incomplete taxonomic assignment, and the high genetic variation of viruses  
256 makes it difficult to obtain an accurate assignment at genus or species level. Recurrent updating of  
257 the RdRps databases is necessary to facilitate the assignment of new ones. Secondly, although some

## Trees' health condition and mycobiota composition

258 of the virus families described may be "cross-kingdom" because they contain members that infect  
259 several kingdoms, it is more common for individual viruses to specialise in hosts of a single  
260 kingdom, as is the case, for example, with the Totiviridae family, where some genera infect fungi and  
261 others protozoa. Similarly, the *in silico* analysis performed does not allow us to verify whether  
262 finding RdRps in organisms from different kingdoms than expected implies that the host is  
263 susceptible to the virus, or that it only acts as a vector or asymptomatic carrier.

### 264 **5 Conclusion**

265 In this work we found great variation in the diversity of RNA viruses of declining Mediterranean  
266 forests, with holm oak forest having the highest richness and chestnut the lowest. Up to 15 viral  
267 families were identified overall, with Botourmiaviridae and Partitiviridae being the most abundant. In  
268 terms of genome type, ssRNA(+) viruses were the most represented, followed by dsRNA and two  
269 ssRNA(-) representatives. Viruses belonging to families with cross-kingdom capabilities such as  
270 Hypoviridae, Mitoviridae and Namaviridae were also found. Lastly, two RdRP sequences had no  
271 matches in available viral databases and should be further investigated.

### 272 **6 Data availability statement**

273 Data and scripts used in this study are available in the following GitHub repository:  
274 [https://github.com/serbiodh/2023\\_Virome\\_MedForests](https://github.com/serbiodh/2023_Virome_MedForests). Raw sequencing data are available at NCBI  
275 SRA under BioProject PRJNA1032577.

### 276 **7 Author contributions**

277 SDH, JNS and WAM collected the data. JNS and WAM carried out the laboratory procedures. SDH,  
278 PLPA and MP analysed the data. SDH, PLPA and JJD wrote the manuscript. SDH, JNS and JJD  
279 designed the sampling scheme. All authors contributed to the article and approved the submitted  
280 version.

### 281 **8 Funding**

282 This work was supported by project VA208P20 funded by JCYL (Spain) and co-financed by FEDER  
283 (UE) budget.

### 284 **9 Acknowledgements**

285 Authors would like to thank Farooq Ahmad, Álvaro Benito Delgado, Irene Teresa Bocos Asenjo,  
286 Mariano Rodríguez Rey and Cristina Zamora Ballesteros for their valuable contributions to sampling.

### 287 **10 Conflict of interest**

288 The authors declare that the research was conducted in the absence of any commercial or financial  
289 relationships that could be construed as a potential conflict of interest.

### 290 **11 References**

291 Andika, I. B., Wei, S., Cao, C., Salaipeth, L., Kondo, H., & Sun, L. (2017). Phytopathogenic fungus  
292 hosts a plant virus: A naturally occurring cross-kingdom viral infection. *Proceedings of the National*  
293 *Academy of Sciences*, 114(46), 12267-12272. <https://doi.org/10.1073/pnas.1714916114>

- 294 Arjona-Lopez, J. M., Telengech, P., Jamal, A., Hisano, S., Kondo, H., Yelin, M. D., ... & Suzuki, N.  
295 (2018). Novel, diverse RNA viruses from Mediterranean isolates of the phytopathogenic fungus,  
296 *Rosellinia necatrix*: insights into evolutionary biology of fungal viruses. *Environmental*  
297 *Microbiology*, 20(4), 1464-1483. <https://doi.org/10.1111/1462-2920.14065>
- 298 Ayllón, M. A., Turina, M., Xie, J., Nerva, L., Marzano, S. Y. L., Donaire, L., & Jiang, D. (2020).  
299 ICTV Virus Taxonomy Profile: Botourmiaviridae. *Journal of General Virology*, 101(5), 454-455.  
300 <https://doi.org/10.1099/JGV.0.001409>
- 301 Babaian, A., & Edgar, R. (2022). Ribovirus classification by a polymerase barcode  
302 sequence. *PeerJ*, 10, e14055. <https://doi.org/10.7717/peerj.14055>
- 303 Balique, F., Lecoq, H., Raoult, D., & Colson, P. (2015). Can plant viruses cross the kingdom border  
304 and be pathogenic to humans?. *Viruses*, 7(4), 2074-2098. <https://doi.org/10.3390/v7042074>
- 305 Bian, R., Andika, I. B., Pang, T., Lian, Z., Wei, S., Niu, E., ... & Sun, L. (2020). Facilitative and  
306 synergistic interactions between fungal and plant viruses. *Proceedings of the National Academy of*  
307 *Sciences*, 117(7), 3779-3788. <https://doi.org/10.1073/pnas.1915996117>
- 308 Botella, L., Jung, M. H., Rost, M., & Jung, T. (2022). Natural Populations from the *Phytophthora*  
309 *palustris* Complex Show a High Diversity and Abundance of ssRNA and dsRNA Viruses. *Journal of*  
310 *Fungi*, 8(11). <https://doi.org/10.3390/JOF8111118>
- 311 Bruenn, J. A., Warner, B. E., & Yerramsetty, P. (2015). Widespread mitovirus sequences in plant  
312 genomes. *PeerJ*, 3, e876. <https://doi.org/10.7717/peerj.876>
- 313 Buchfink, B., Reuter, K., & Drost, H. G. (2021). Sensitive protein alignments at tree-of-life scale  
314 using DIAMOND. *Nature methods*, 18(4), 366-368. <https://doi.org/10.1038/s41592-021-01101-x>
- 315 Cao, X., Liu, J., Pang, J., Kondo, H., Chi, S., Zhang, J., ... & Andika, I. B. (2022). Common but  
316 nonpersistent acquisitions of plant viruses by plant-associated fungi. *Viruses*, 14(10), 2279.  
317 <https://doi.org/10.3390/v14102279>
- 318 Charif, D., Lobry, J. R., Necsulea, A., Palmeira, L., Penel, S., Perriere, G., & Penel, M. S. (2023).  
319 Package 'seqinr'. <https://seqinr.r-forge.r-project.org/>
- 320 Chiapello, M., Rodríguez-Romero, J., Ayllón, M. A., & Turina, M. (2020). Analysis of the virome  
321 associated to grapevine downy mildew lesions reveals new mycovirus lineages. *Virus evolution*, 6(2).  
322 <https://doi.org/10.1093/VE/VEAA058>
- 323 Cross, S. T., Brehm, A. L., Dunham, T. J., Rodgers, C. P., Keene, A. H., Borlee, G. I., & Stenglein,  
324 M. D. (2023). Galbut Virus Infection Minimally Influences *Drosophila melanogaster* Fitness Traits in  
325 a Strain and Sex-Dependent Manner. *Viruses*, 15(2). <https://doi.org/10.3390/V15020539>
- 326 Daugrois, J. H., Filloux, D., Julian, C., Claude, L., Ferdinand, R., Fernandez, E., Fontes, H., Rott, P.  
327 C., & Roumagnac, P. (2021). Comparison of the virome of quarantined sugarcane varieties and the  
328 virome of grasses growing near the quarantine station. *Viruses*, 13(5).  
329 <https://doi.org/10.3390/V13050922>



## Trees' health condition and mycobiota composition

- 330 de Rezende, R. R., de Oliveira Souza, F., Leal, L. L., Morgan, T., Bermudez, J. M. M., Cascardo, R.  
331 de S., de Barros, D. R., & Alfenas-Zerbini, P. (2021). Characterization of a new mitovirus infecting  
332 the phytopathogenic fungus *Microdochium albescens*. *Archives of Virology*, *166*(12), 3455-3459.  
333 <https://doi.org/10.1007/S00705-021-05242-4>
- 334 Dezordi, F. Z., Vasconcelos, C. R. D. S., Rezende, A. M., & Wallau, G. L. (2020). In and outs of  
335 Chuviridae endogenous viral elements: Origin of a potentially new retrovirus and signature of ancient  
336 and ongoing arms race in mosquito genomes. *Frontiers in Genetics*, *11*, 542437.  
337 <https://doi.org/10.3389/fgene.2020.542437>
- 338 Dietzgen, R. G., Mann, K. S., & Johnson, K. N. (2016). Plant virus–insect vector interactions:  
339 Current and potential future research directions. *Viruses*, *8*(11), 303.  
340 <https://doi.org/10.3390/v8110303>
- 341 Faizah, A. N., Kobayashi, D., Isawa, H., Amoa-Bosompem, M., Murota, K., ..., & Sawabe, K.  
342 (2020). Deciphering the Virome of *Culex vishnui* Subgroup Mosquitoes, the Major Vectors of  
343 Japanese Encephalitis, in Japan. *Viruses*, *12*(3), 264. <https://doi.org/10.3390/V12030264>
- 344 Hillman, B. I., & Cai, G. (2013). The Family Narnaviridae: Simplest of RNA Viruses. *Advances in*  
345 *Virus Research*, *86*, 149-176. <https://doi.org/10.1016/B978-0-12-394315-6.00006-4>
- 346 Hoang, D. T., Chernomor, O., Von Haeseler, A., Minh, B. Q., & Vinh, L. S. (2018). UFBoot2:  
347 improving the ultrafast bootstrap approximation. *Molecular biology and evolution*, *35*(2), 518-522.  
348 <https://doi.org/10.1093/molbev/msx281>
- 349 Hong, Y., Cole, T. E., Brasier, C. M., & Buck, K. W. (1998). Evolutionary Relationships among  
350 Putative RNA-Dependent RNA Polymerases Encoded by a Mitochondrial Virus-like RNA in the  
351 Dutch Elm Disease Fungus, *Ophiostoma novo-ulmi*, by Other Viruses and Virus-like RNAs and by  
352 the *Arabidopsis* Mitochondrial Genome. *Virology*, *246*(1), 158-169.  
353 <https://doi.org/10.1006/VIRO.1998.9178>
- 354 Hough, B., Steenkamp, E., Wingfield, B., & Read, D. (2023). Fungal Viruses Unveiled: A  
355 Comprehensive Review of Mycoviruses. *Viruses*, *15*(5). <https://doi.org/10.3390/V15051202>
- 356 Hurwitz, B. L., & Sullivan, M. B. (2013). The Pacific Ocean Virome (POV): A Marine Viral  
357 Metagenomic Dataset and Associated Protein Clusters for Quantitative Viral Ecology. *PLOS ONE*,  
358 *8*(2), e57355. <https://doi.org/10.1371/JOURNAL.PONE.0057355>
- 359 Jakubowska, A. K., Nalcacioglu, R., Millán-Leiva, A., Sanz-Carbonell, A., Muratoglu, H., Herrero,  
360 S., & Demirbag, Z. (2015). In search of pathogens: transcriptome-based identification of viral  
361 sequences from the pine processionary moth (*Thaumetopoea pityocampa*). *Viruses*, *7*(2), 456-479.  
362 <https://doi.org/10.3390/v7020456>
- 363 Kalyaanamoorthy, S., Minh, B. Q., Wong, T. K., Von Haeseler, A., & Jermin, L. S. (2017).  
364 ModelFinder: fast model selection for accurate phylogenetic estimates. *Nature methods*, *14*(6), 587-  
365 589. <https://doi.org/10.1038/nmeth.4285>
- 366 Katoh, K., Rozewicki, J., & Yamada, K. D. (2019). MAFFT online service: multiple sequence  
367 alignment, interactive sequence choice and visualization. *Briefings in bioinformatics*, *20*(4), 1160-  
368 1166. <https://doi.org/10.1093/bib/bbx108>

- 369 Koonin, E. V., Dolja, V. V., & Krupovic, M. (2015). Origins and evolution of viruses of eukaryotes:  
370 The ultimate modularity. *Virology*, 479, 2. <https://doi.org/10.1016/J.VIROL.2015.02.039>
- 371 Kotta-Loizou, I., Castón, J. R., Coutts, R. H., Hillman, B. I., Jiang, D., Kim, D. H., ... & ICTV Report  
372 Consortium. (2020). ICTV virus taxonomy profile: Chrysoviridae. *Journal of General*  
373 *Virology*, 101(2), 143-144. <https://doi.org/10.1099/jgv.0.001383>
- 374 Kotta-Loizou, I., & Coutts, R. H. A. (2022). ICTV Virus Taxonomy Profile: Polymycoviridae 2022.  
375 *Journal of General Virology*, 103(5). <https://doi.org/10.1099/JGV.0.001747>
- 376 Kryukov, K., Ueda, M. T., Imanishi, T., & Nakagawa, S. (2019). Systematic survey of non-retroviral  
377 virus-like elements in eukaryotic genomes. *Virus research*, 262, 30-36.  
378 <https://doi.org/10.1016/j.virusres.2018.02.002>
- 379 Lappe, R. R., Elmore, M. G., Lozier, Z. R., Jander, G., Miller, W. A., & Whitham, S. A. (2022).  
380 Metagenomic identification of novel viruses of maize and teosinte in North America. *BMC*  
381 *Genomics*, 23(1). <https://doi.org/10.1186/S12864-022-09001-W>
- 382 Lefeuvre, P., Martin, D. P., Elena, S. F., Shepherd, D. N., Roumagnac, P., & Varsani, A. (2019).  
383 Evolution and ecology of plant viruses. *Nature Reviews Microbiology*, 17(10), 632-644.  
384 <https://doi.org/10.1038/s41579-019-0232-3>
- 385 Linnakoski, R., Sutela, S., Coetzee, M. P., Duong, T. A., Pavlov, I. N., Litovka, Y. A., ... & Vainio,  
386 E. J. (2021). Armillaria root rot fungi host single-stranded RNA viruses. *Scientific reports*,  
387 11(1), 7336. <https://doi.org/10.1038/s41598-021-86343-7>
- 388 Liu, H., Fu, Y., Xie, J., Cheng, J., Ghabrial, S. A., Li, G., ... & Jiang, D. (2012). Evolutionary  
389 genomics of mycovirus-related dsRNA viruses reveals cross-family horizontal gene transfer and  
390 evolution of diverse viral lineages. *BMC evolutionary biology*, 12, 1-15.  
391 <https://doi.org/10.1186/1471-2148-12-91>
- 392 Liu, S., Xie, J., Cheng, J., Li, B., Chen, T., Fu, Y., ... & Jiang, D. (2016). Fungal DNA virus infects a  
393 mycophagous insect and utilizes it as a transmission vector. *Proceedings of the National Academy of*  
394 *Sciences*, 113(45), 12803-12808. <https://doi.org/10.1073/pnas.1608013113>
- 395 Ma, Y., Fort, T., Marais, A., Lefeuvre, M., Theil, S., Vacher, C., & Candresse, T. (2021). Leaf-  
396 associated fungal and viral communities of wild plant populations differ between cultivated and  
397 natural ecosystems. *Plant-Environment Interactions*, 2(2), 87-99. <https://doi.org/10.1002/PEI3.10043>
- 398 Mackay, I. M., & Arden, K. E. (2016). Mayaro virus: a forest virus primed for a trip to the  
399 city?. *Microbes and infection*, 18(12), 724-734. <https://doi.org/10.1016/j.micinf.2016.10.007>
- 400 Marienfeld, J., Unseld, M., & Brennicke, A. (1999). The mitochondrial genome of Arabidopsis is  
401 composed of both native and immigrant information. *Trends in Plant Science*, 4(12), 495-502.  
402 [https://doi.org/10.1016/S1360-1385\(99\)01502-2](https://doi.org/10.1016/S1360-1385(99)01502-2)
- 403 Martin, M. (2011). Cutadapt removes adapter sequences from high-throughput sequencing  
404 reads. *EMBnet. journal*, 17(1), 10-12. <https://doi.org/10.14806/ej.17.1.200>

## Trees' health condition and mycobiota composition

- 405 Médail, F., Monnet, A. C., Pavon, D., Nikolic, T., Dimopoulos, P., Bacchetta, G., Arroyo, J., Barina,  
406 Z., Albassatneh, M. C., Domina, G., Fady, B., Matevski, V., Mifsud, S., & Leriche, A. (2019). What  
407 is a tree in the mediterranean basin hotspot? A critical analysis. *Forest Ecosystems*, 6(1), 1-19.  
408 <https://doi.org/10.1186/S40663-019-0170-6>
- 409 Mifsud, J. C., Gallagher, R. V., Holmes, E. C., & Geoghegan, J. L. (2022). Transcriptome mining  
410 expands knowledge of RNA viruses across the plant kingdom. *Journal of Virology*, 96(24), e00260-  
411 22. <https://doi.org/10.1128/jvi.00260-22>
- 412 Moreno, G., Gonzalez-Bornay, G., Pulido, F., Lopez-Diaz, M. L., Bertomeu, M., Juárez, E., & Diaz,  
413 M. (2016). Exploring the causes of high biodiversity of Iberian dehesas: the importance of wood  
414 pastures and marginal habitats. *Agroforestry Systems*, 90(1), 87-105. [https://doi.org/10.1007/S10457-  
415 015-9817-7](https://doi.org/10.1007/S10457-015-9817-7)
- 416 Nerva, L., Varese, G. C., Falk, B. W., & Turina, M. J. S. R. (2017). Mycoviruses of an endophytic  
417 fungus can replicate in plant cells: evolutionary implications. *Scientific Reports*, 7(1), 1908.  
418 <https://doi.org/10.1038/s41598-017-02017-3>
- 419 Newbold, T., Oppenheimer, P., Etard, A., and Williams, J. J. (2020). Tropical and Mediterranean  
420 biodiversity is disproportionately sensitive to land-use and climate change. *Nature Ecology &  
421 Evolution*, 4(12), 1630-1638. <https://doi.org/10.1038/s41559-020-01303-0>
- 422 Nguyen, L. T., Schmidt, H. A., Von Haeseler, A., & Minh, B. Q. (2015). IQ-TREE: a fast and  
423 effective stochastic algorithm for estimating maximum-likelihood phylogenies. *Molecular biology  
424 and evolution*, 32(1), 268-274. <https://doi.org/10.1093/molbev/msu300>
- 425 Nibert, M. L., Vong, M., Fugate, K. K., & Debat, H. J. (2018). Evidence for contemporary plant  
426 mitoviruses. *Virology*, 518, 14-24. <https://doi.org/10.1016/j.virol.2018.02.005>
- 427 Nunes, L. J., Meireles, C. I., Gomes, C. J. P., Ribeiro, N., & Almeida, M. C. (2022). The impact of  
428 climate change on forest development: a sustainable approach to management models applied to  
429 Mediterranean-type climate regions. *Plants*, 11(1), 69. <https://doi.org/10.3390/plants11010069>
- 430 Paraskevopoulou, S., Käfer, S., Zirkel, F., Donath, A., Petersen, M., Liu, S., ... & Junglen, S. (2021).  
431 Viromics of extant insect orders unveil the evolution of the flavivirus superfamily. *Virus Evolution*,  
432 7(1), veab030. <https://doi.org/10.1093/ve/veab030>
- 433 Pilarska, D., Georgiev, G., Dobрева, M., Takov, D., Mirchev, P., Doychev, D., ... & Hajek, A. E.  
434 (2018). Pathogens and parasitoids of forest pest insects in the region of Forest Protection Station  
435 Plovdiv during the period 1990–2017. *Silva*, 19, 3.
- 436 Prjibelski, A., Antipov, D., Meleshko, D., Lapidus, A., & Korobeynikov, A. (2020). Using SPAdes  
437 de novo assembler. *Current protocols in bioinformatics*, 70(1), e102.  
438 <https://doi.org/10.1002/cpbi.102>
- 439 R Core Team (2022). R: A language and environment for statistical computing. R Foundation for  
440 Statistical Computing, Vienna, Austria. URL <https://www.R-project.org/>
- 441 Rastgou, M., Habibi, M. K., Izadpanah, K., Masenga, V., Milne, R. G., Wolf, Y. I., Koonin, E. V., &  
442 Turina, M. (2009). Molecular characterization of the plant virus genus Ourmiavirus and evidence of

- 443 inter-kingdom reassortment of viral genome segments as its possible route of origin. *The Journal of*  
444 *general virology*, 90(Pt 10), 2525-2535. <https://doi.org/10.1099/VIR.0.013086-0>
- 445 Rodríguez-Rojo, M. P., Roig, S., López-Carrasco, C., Redondo García, M. M., & Sánchez- Mata, D.  
446 (2022). Which Factors Favour Biodiversity in Iberian Dehesas? *Sustainability* 2022, Vol. 14, Page  
447 2345, 14(4), 2345. <https://doi.org/10.3390/SU14042345>
- 448 Rumbou, A., Vainio, E. J., & Büttner, C. (2021). Towards the forest virome: high-throughput  
449 sequencing drastically expands our understanding on virosphere in temperate forest ecosystems.  
450 *Microorganisms*, 9(8), 1730. <https://doi.org/10.3390/microorganisms9081730>
- 451 Sömera, M., Fargette, D., Hébrard, E., & Sarmiento, C. (2021). ICTV Virus Taxonomy Profile:  
452 Solemoviridae 2021. *Journal of General Virology*, 102(12). <https://doi.org/10.1099/JGV.0.001707>
- 453 van Diepeningen, AD. (2021). Biocontrol via mycoviruses: a neglected option for bioprotection? In:  
454 Jürgen Köhl J, Willem Ravensberg W, editores. *Microbial bioprotectants for plant disease*  
455 *management* (pp. 541-584). Burleigh Dodds Science. <https://doi.org/10.19103/AS.2021.0093.20>
- 456 Wang, Q., Mu, F., Xie, J., Cheng, J., Fu, Y., & Jiang, D. (2020). A Single ssRNA Segment Encoding  
457 RdRp Is Sufficient for Replication, Infection, and Transmission of Ourmia- Like Virus in Fungi.  
458 *Frontiers in microbiology*, 11. <https://doi.org/10.3389/FMICB.2020.00379>
- 459 Wheeler, T. J., Clements, J., & Finn, R. D. (2014). Skylign: a tool for creating informative,  
460 interactive logos representing sequence alignments and profile hidden Markov models. *BMC*  
461 *bioinformatics*, 15, 1-9. <https://doi.org/10.1186/1471-2105-15-7>
- 462 Whitfield, A. E., Falk, B. W., & Rotenberg, D. (2015). Insect vector-mediated transmission of plant  
463 viruses. *Virology*, 479, 278-289. <https://doi.org/10.1016/j.virol.2015.03.026>
- 464 Wilcox, B. A., & Ellis, B. (2006). Forests and emerging infectious diseases of humans. *UNASYLVA*  
465 – *FAO*, 57(2), 11. <https://www.fao.org/3/a0789e/a0789e03.htm>
- 466 Wu, Z., Yang, L., Ren, X., He, G., Zhang, J., ..., & Jin, Q. (2015). Deciphering the bat virome catalog  
467 to better understand the ecological diversity of bat viruses and the bat origin of emerging infectious  
468 diseases. *The ISME Journal* 2016 10:3, 10(3), 609-620. <https://doi.org/10.1038/ismej.2015.138>
- 469 Yin, H. chang, Wan, D. cai, & Chen, H. yan. (2022). Metagenomic analysis of viral diversity and a  
470 novel astrovirus of forest rodent. *Virology Journal*, 19(1), 138. <https://doi.org/10.1186/S12985-022-01847-6>
- 471
- 472 Yu, G. (2020). Using ggtree to visualize data on tree-like structures. *Current protocols in*  
473 *bioinformatics*, 69(1), e96. <https://doi.org/10.1002/cpbi.96>
- 474 Zhou, L., Feng, T., Xu, S., Gao, F., Lam, T. T., Wang, Q., ... & Yu, G. (2022). ggmsa: A visual  
475 exploration tool for multiple sequence alignment and associated data. *Briefings in*  
476 *Bioinformatics*, 23(4), bbac222. <https://doi.org/10.1093/bib/bbac222>

477 **12 Figure legends**



## Trees' health condition and mycobiota composition

478 **Figure 1. Map of sampling sites.** A Map of Spain. Castile and Leon region is highlighted with a  
 479 black and thick contour. Orange and purple areas correspond to Salamanca and Leon provinces,  
 480 respectively. B Municipalities from where samples were taken (top: Leon, bottom: Salamanca). C  
 481 Sampling areas (white polygons) overlaid on top of physical maps. Coloured lines in La Alamedilla  
 482 correspond to four sampling transects.

483 **Figure 2. RdRp counts by habitat and sample type.**

484 **Figure 3. Distribution of viral families per habitat, sample type and genome type.** Colour's  
 485 gradient from white to purple indicates abundance.

486 **Figure 4. Phylogenetic tree of RdRps.** Left: consensus tree with bootstrap confidence values. Each  
 487 branch is labelled with the taxonomic level followed by the identity assigned to that particular RdRp.  
 488 Vertical rectangles with black outline indicate viral phyla (-viricota). Right: multiple sequence  
 489 alignment with A, B and C motifs and their corresponding logos. Blue and red regions indicate well-  
 490 conserved residues.

### 491 13 Tables

492 **Table 1.** Description of sampling sites.

| Location               | Province  | Characteristics                          | Sampled species        |
|------------------------|-----------|------------------------------------------|------------------------|
| La Alamedilla          | Salamanca | Elevation: 756 m<br>Rainfall: 600-854 mm | <i>Quercus ilex</i>    |
| Las Médulas            | León      | Elevation: 511 m<br>Rainfall: 400-500 mm | <i>Castanea sativa</i> |
| Villafranca del Bierzo | León      | Elevation: 505 m<br>Rainfall: 400-500 mm | <i>Pinus radiata</i>   |

493 **Table 2.** Taxonomic distribution of RdRps.

| Phylum | Class | Order | Family | Genus | Species | Not assigned <sup>1</sup> | Unknown <sup>2</sup> |
|--------|-------|-------|--------|-------|---------|---------------------------|----------------------|
| 4      | 14    | 12    | 67     | 20    | 5       | 22                        | 2                    |

494 <sup>1</sup>RdRps found in databases that had no taxonomy assigned yet

495 <sup>2</sup>RdRps that could not be found in any database

496 **Table 3.** Taxonomic assignment of RdRps per genome type.

| Genome |
|--------|
|--------|

|                          | ssRNA(+)                                                                                                               | ssRNA(-)        | dsRNA                                                  |
|--------------------------|------------------------------------------------------------------------------------------------------------------------|-----------------|--------------------------------------------------------|
| <b>Family (-viridae)</b> | Botourmia-<br>Dicistro-<br>Endorna-<br>Fusari-<br>Hypo-<br>Ifla-<br>Mito-<br>Narna-<br>Sinhali-<br>Solemo-<br>Tombus-  | Chu-<br>Phenui- | Chryso-<br>Partiti-<br>Polymyco-<br>Toti-              |
| <b>Genus (-virus)</b>    | Alphanoda-<br>Alphanecro-<br>Mito-<br>Narna-<br>Ourmia-                                                                |                 | Alphachryso-<br>Betapartiti-<br>Botybirna-<br>Victori- |
| <b>Species</b>           | Black queen cell virus<br>Deformed wing virus<br>Lake Sinai Virus<br>Lake Sinai Virus 2<br>Hubei picorna-like virus 15 |                 |                                                        |

497 **Table 4. Count of RdRps per habitat and sample type.**

|                 | Tree | Fungi from tree | Arthropod | Fungi from arthropod |
|-----------------|------|-----------------|-----------|----------------------|
| <b>Chestnut</b> | 1    | 2               | 11        | 9                    |
| <b>Pine</b>     | 16   | 7               | 9         | 7                    |
| <b>Holm oak</b> | 51   | 14              | 11        | 8                    |

498

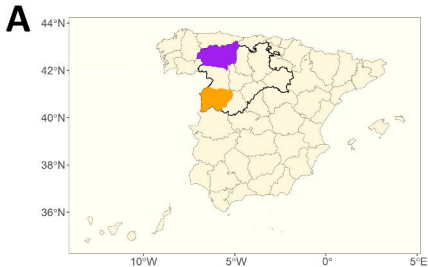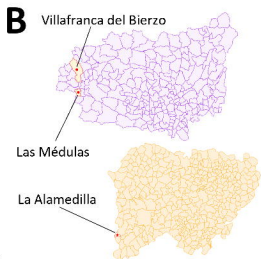

**C**

La Alamedilla  
(*Quercus ilex*)

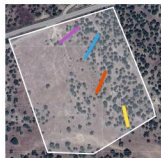

Las Médulas  
(*Castanea sativa*)

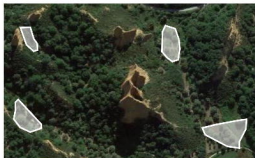

Villafranca del Bierzo  
(*Pinus radiata*)

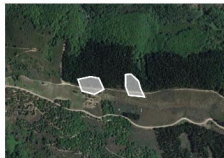

Frequency

80  
60  
40  
20  
0

- Tree
- Fungi from tree
- Fungi from arthropod
- Arthropod

C.sativa

P.radiata

Q.ilex

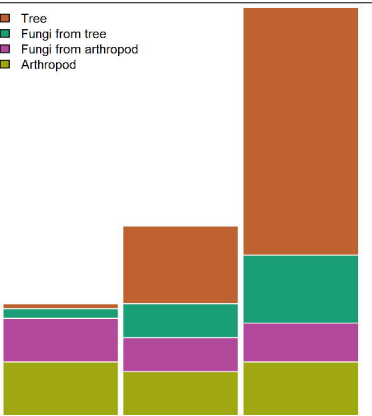



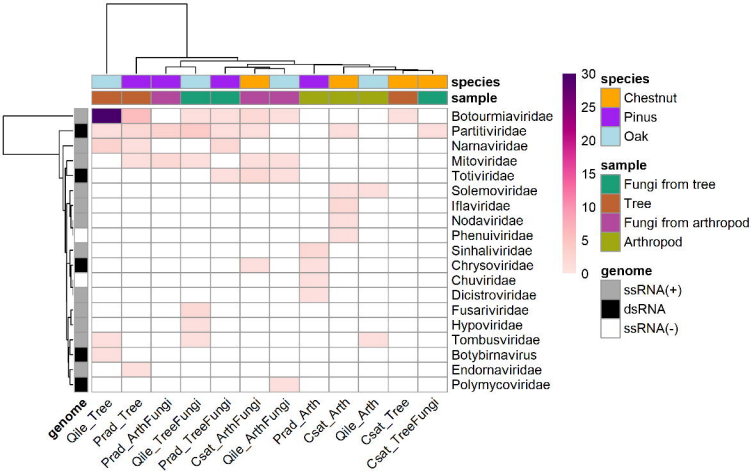

Source: https://www.biorxiv.org/content/10.1101/2023.10.28.564537v1.full.pdf
